# Supplementary material for: The Characterization of Melanaphis sacchari Microbiota and Antibiotic Treatment Effect on Insects
Source: MDPI journal article supplement (doi:10.3390/insects14100807), 2023-10-11
Supplement: s1 [file s1]

## Supplementary material

### Supplementary tables

**Table S1.** Primers used for amplification of target genes from *M. sacchari* and *Wolbachia* spp.

| Gen          | Organism              | Primer Name       | Sequence (5'→3')               | Amplicon (bp) | Reference |
|--------------|-----------------------|-------------------|--------------------------------|---------------|-----------|
| <i>tpgs2</i> | <i>M. sacchari</i>    | MsTPGS2-F         | TTGCCCATCGGAAACATCACTGTG       | 135           | This work |
|              |                       | MsTPGS2-R         | TGGCGTGTTCTTGTCGGATAAACG       |               |           |
| <i>16S</i>   | <i>Wolbachia</i> spp. | WSPEC-F           | CATACCTATTCTGAAGGGATAG         | 438           | [1]       |
|              |                       | WSPEC-R           | AGCTTCGAGTGAAACCAATTC          |               |           |
| <i>ftsZ</i>  |                       | Wolbachia FtsZ-F  | TACTGACTGTTGGAGTTGTAATAAGCCGT  | 570           | [2]       |
|              |                       | Wolbachia FtsZ-R  | TGCCAGTTGCAAGAACAGAAACTCTAACTC |               |           |
| <i>wsp</i>   |                       | Wolbachia sp-81F  | TGGTCCAATAAGTGATGAAGAAAC       | ≈600          | [3,4]     |
|              |                       | Wolbachia sp-691R | AAAAATTAAACGCTACTCCA           |               |           |

- [1] Werren, J.H.; Windsor, D.M. *Wolbachia* Infection Frequencies in Insects: Evidence of a Global Equilibrium? *Proc. R. Soc. Lond. B Biol. Sci.* **2000**, *267*, 1277–1285. <https://doi.org/10.1098/rspb.2000.1139>.
- [2] Zha, X.; Zhang, W.; Zhou, C.; Zhang, L.; Xiang, Z.; Xia, Q. Detection and Characterization of *Wolbachia* Infection in Silkworm. *Genet. Mol. Biol.* **2014**, *37*, 573–580. <https://doi.org/10.1590/S1415-47572014000400014>.
- Zhou, W.; Rousset, F.; O'Neill, S. Phylogeny and PCR-based Classification of *Wolbachia* Strains Using *Wsp* Gene Sequences. *Proc. R. Soc. Lond. B Biol. Sci.* **1998**, *265*, 509–515. <https://doi.org/10.1098/rspb.1998.0324>.
- Braig, H.R.; Zhou, W.; Dobson, S.L.; O'Neill, S.L. Cloning and Characterization of a Gene Encoding the Major Surface Protein of the Bacterial Endosymbiont *Wolbachia pipientis*. *J. Bacteriol.* **1998**, *180*, 2373–2378. <https://doi.org/10.1128/JB.180.9.2373-2378.1998>.

**Table S2.** Relative abundances of the *M. sacchari* microbiota.

| Phylum         | Class               | Order            | Family             | Genus            | Specie                            | Relative abundance |
|----------------|---------------------|------------------|--------------------|------------------|-----------------------------------|--------------------|
| Proteobacteria | Gammaproteobacteria | Enterobacterales | Erwiniaceae        | Buchnera         | <i>Buchnera aphidicola</i>        | 0.98365            |
| Proteobacteria | Gammaproteobacteria | Enterobacterales | Enterobacteriaceae | Salmonella       | <i>Salmonella enterica</i>        | 0.00521            |
| Proteobacteria | Gammaproteobacteria | Enterobacterales | Enterobacteriaceae | Escherichia      | <i>Escherichia coli</i>           | 0.00314            |
| Firmicutes     | Bacilli             | Lactobacillales  | Streptococcaceae   | Streptococcus    |                                   | 0.00070            |
| Proteobacteria | Gammaproteobacteria | Enterobacterales | Enterobacteriaceae | Klebsiella       | <i>Klebsiella pneumoniae</i>      | 0.00068            |
| Firmicutes     | Negativicutes       | Veillonellales   | Veillonellaceae    | Veillonella      | <i>Veillonella parvula</i>        | 0.00047            |
| Proteobacteria | Gammaproteobacteria | Enterobacterales | Enterobacteriaceae | Klebsiella       | <i>Klebsiella quasipneumoniae</i> | 0.00045            |
| Proteobacteria | Gammaproteobacteria | Pasteurellales   | Pasteurellaceae    | Haemophilus      | <i>Haemophilus parainfluenzae</i> | 0.00038            |
| Proteobacteria | Gammaproteobacteria | Enterobacterales | Yersiniaceae       | Yersinia         | <i>Yersinia pestis</i>            | 0.00028            |
| Proteobacteria | Gammaproteobacteria | Enterobacterales | Yersiniaceae       | Yersinia         |                                   | 0.00028            |
| Firmicutes     | Bacilli             | Bacillales       | Staphylococcaceae  | Staphylococcus   | <i>Staphylococcus aureus</i>      | 0.00024            |
| Proteobacteria | Gammaproteobacteria | Enterobacterales | Enterobacteriaceae | Enterobacter     | <i>Enterobacter bugandensis</i>   | 0.00024            |
| Bacteroidetes  | Bacteroidia         | Bacteroidales    | Prevotellaceae     | Prevotella       | <i>Prevotella intermedia</i>      | 0.00021            |
| Firmicutes     | Negativicutes       | Veillonellales   | Veillonellaceae    | Veillonella      | <i>Veillonella rodentium</i>      | 0.00021            |
| Proteobacteria | Gammaproteobacteria | Vibrionales      | Vibrionaceae       | Vibrio           | <i>Vibrio cholerae</i>            | 0.00017            |
| Firmicutes     | Bacilli             | Bacillales       |                    | Gemella          | <i>Gemella sanguinis</i>          | 0.00015            |
| Proteobacteria | Alphaproteobacteria | Hyphomicrobiales | Bradyrhizobiaceae  | Rhodopseudomonas | <i>Rhodopseudomonas palustris</i> | 0.00015            |
| Proteobacteria | Gammaproteobacteria | Aeromonadales    | Aeromonadaceae     | Aeromonas        | <i>Aeromonas rivipollensis</i>    | 0.00015            |
| Proteobacteria | Gammaproteobacteria | Pasteurellales   | Pasteurellaceae    | Bibersteinia     | <i>Bibersteinia trehalosi</i>     | 0.00015            |
| Actinobacteria | Actinomycetia       | Micrococcales    | Micrococcaceae     | Rothia           | <i>Rothia mucilaginosa</i>        | 0.00013            |
| Firmicutes     | Bacilli             | Bacillales       | Bacillaceae        | Bacillus         |                                   | 0.00011            |
| Bacteroidetes  | Bacteroidia         | Bacteroidales    | Prevotellaceae     | Prevotella       | <i>Prevotella melaninogenica</i>  | 0.00009            |
| Proteobacteria | Betaproteobacteria  | Burkholderiales  | Comamonadaceae     | Acidovorax       |                                   | 0.00009            |
| Proteobacteria | Betaproteobacteria  | Burkholderiales  | Comamonadaceae     | Acidovorax       |                                   | 0.00009            |

| Phylum         | Class               | Order             | Family              | Genus          | Specie                                   | Relative Abundance |
|----------------|---------------------|-------------------|---------------------|----------------|------------------------------------------|--------------------|
| Proteobacteria | Gammaproteobacteria | Vibrionales       | Vibrionaceae        | Vibrio         | <i>Vibrio anguillarum</i>                | 0.00009            |
| Firmicutes     | Bacilli             | Lactobacillales   | Streptococcaceae    | Streptococcus  | <i>Streptococcus dysgalactiae</i>        | 0.00008            |
| Firmicutes     | Bacilli             | Lactobacillales   | Streptococcaceae    | Streptococcus  |                                          | 0.00008            |
| Firmicutes     | Bacilli             | Lactobacillales   | Streptococcaceae    | Streptococcus  | <i>Streptococcus thermophilus</i>        | 0.00008            |
| Proteobacteria | Alphaproteobacteria | Caulobacterales   | Caulobacteraceae    | Caulobacter    | <i>Caulobacter mirabilis</i>             | 0.00008            |
| Proteobacteria | Alphaproteobacteria | Hyphomicrobiales  | Rhizobiaceae        | Liberibacter   | <i>Candidatus Liberibacter asiaticus</i> | 0.00008            |
| Actinobacteria | Actinomycetia       | Actinomycetales   | Actinomycetaceae    | Actinomyces    |                                          | 0.00006            |
| Firmicutes     | Bacilli             | Bacillales        | Bacillaceae         | Bacillus       | <i>Bacillus velezensis</i>               | 0.00006            |
| Fusobacteria   | Fusobacteriia       | Fusobacteriales   | Leptotrichiaceae    | Leptotrichia   | <i>Leptotrichia sp. oral taxon 212</i>   | 0.00006            |
| Fusobacteria   | Fusobacteriia       | Fusobacteriales   | Leptotrichiaceae    | Leptotrichia   |                                          | 0.00006            |
| Proteobacteria | Alphaproteobacteria | Caulobacterales   | Caulobacteraceae    | Caulobacter    | <i>Caulobacter flavus</i>                | 0.00006            |
| Proteobacteria | Alphaproteobacteria | Hyphomicrobiales  | Bradyrhizobiaceae   | Bradyrhizobium |                                          | 0.00006            |
| Proteobacteria | Gammaproteobacteria | Alteromonadales   | Alteromonadaceae    | Alteromonas    | <i>Alteromonas sp. RW2A1</i>             | 0.00006            |
| Proteobacteria | Gammaproteobacteria | Alteromonadales   | Alteromonadaceae    | Alteromonas    |                                          | 0.00006            |
| Proteobacteria | Gammaproteobacteria | Vibrionales       | Vibrionaceae        | Vibrio         | <i>Vibrio campbellii</i>                 | 0.00006            |
| Actinobacteria | Actinomycetia       | Micrococcales     | Microbacteriaceae   | Microbacterium | <i>Microbacterium hominis</i>            | 0.00004            |
| Firmicutes     | Bacilli             | Bacillales        | Staphylococcaceae   | Staphylococcus | <i>Staphylococcus sp. AntiMn-1</i>       | 0.00004            |
| Firmicutes     | Bacilli             | Bacillales        | Staphylococcaceae   | Staphylococcus | <i>Staphylococcus warneri</i>            | 0.00004            |
| Firmicutes     | Bacilli             | Lactobacillales   | Streptococcaceae    | Streptococcus  | <i>Streptococcus parasanguinis</i>       | 0.00004            |
| Firmicutes     | Bacilli             | Lactobacillales   | Streptococcaceae    | Streptococcus  | <i>Streptococcus pyogenes</i>            | 0.00004            |
| Firmicutes     | Bacilli             | Lactobacillales   | Streptococcaceae    | Streptococcus  | <i>Streptococcus sp. 116-D4</i>          | 0.00004            |
| Firmicutes     | Bacilli             | Lactobacillales   | Streptococcaceae    | Streptococcus  | <i>Streptococcus sp. oral taxon 061</i>  | 0.00004            |
| Proteobacteria | Betaproteobacteria  | Neisseriales      | Neisseriaceae       | Neisseria      |                                          | 0.00004            |
| Proteobacteria | Gammaproteobacteria | Enterobacteriales | Bruguierivoracaceae | Sodalis        | <i>Candidatus Sodalis pierantonius</i>   | 0.00004            |
| Proteobacteria | Gammaproteobacteria | Enterobacteriales | Enterobacteriaceae  | Enterobacter   | <i>Enterobacter ludwigii</i>             | 0.00004            |
| Proteobacteria | Gammaproteobacteria | Enterobacteriales | Hafniaceae          | Edwardsiella   | <i>Edwardsiella ictaluri</i>             | 0.00004            |

| Phylum         | Class               | Order              | Family              | Genus            | Specie                                 | Relative abundance |
|----------------|---------------------|--------------------|---------------------|------------------|----------------------------------------|--------------------|
| Proteobacteria | Gammaproteobacteria | Enterobacterales   | Morganellaceae      | Proteus          | <i>Proteus vulgaris</i>                | 0.00004            |
| Proteobacteria | Gammaproteobacteria | Enterobacterales   | Yersiniaceae        | Serratia         | <i>Serratia marcescens</i>             | 0.00004            |
| Proteobacteria | Gammaproteobacteria | Vibrionales        | Vibrionaceae        | Vibrio           | <i>Vibrio taketomensis</i>             | 0.00004            |
| Actinobacteria | Actinomycetia       | Micrococcales      | Micrococcaceae      | Arthrobacter     |                                        | 0.00002            |
| Actinobacteria | Actinomycetia       | Micrococcales      | Micrococcaceae      | Arthrobacter     |                                        | 0.00002            |
| Actinobacteria | Actinomycetia       | Pseudonocardiales  | Pseudonocardiaceae  | Amycolatopsis    |                                        | 0.00002            |
| Actinobacteria | Actinomycetia       | Pseudonocardiales  | Pseudonocardiaceae  | Amycolatopsis    |                                        | 0.00002            |
| Bacteroidetes  | Bacteroidia         | Bacteroidales      | Rikenellaceae       | Alistipes        |                                        | 0.00002            |
| Bacteroidetes  | Bacteroidia         | Bacteroidales      | Rikenellaceae       | Alistipes        |                                        | 0.00002            |
| Bacteroidetes  | Cytophagia          | Cytophagales       | Cytophagaceae       | Rhodocytophaga   | <i>Rhodocytophaga rosea</i>            | 0.00002            |
| Bacteroidetes  | Flavobacteriia      | Flavobacteriales   | Weeksellaceae       | Chryseobacterium | <i>Chryseobacterium camelliae</i>      | 0.00002            |
| Bacteroidetes  | Flavobacteriia      | Flavobacteriales   | Weeksellaceae       |                  |                                        | 0.00002            |
| Bacteroidetes  | Sphingobacteriia    | Sphingobacteriales | Sphingobacteriaceae | Mucilaginibacter | <i>Mucilaginibacter gotjawali</i>      | 0.00002            |
| Firmicutes     | Bacilli             | Bacillales         | Bacillaceae         | Bacillus         | <i>Bacillus amyloliquefaciens</i>      | 0.00002            |
| Firmicutes     | Bacilli             | Bacillales         | Bacillaceae         | Bacillus         | <i>Bacillus cereus</i>                 | 0.00002            |
| Firmicutes     | Bacilli             | Bacillales         | Bacillaceae         | Bacillus         | <i>Bacillus thuringiensis</i>          | 0.00002            |
| Firmicutes     | Bacilli             | Bacillales         | Listeriaceae        | Listeria         | <i>Listeria monocytogenes</i>          | 0.00002            |
| Firmicutes     | Bacilli             | Bacillales         | Staphylococcaceae   | Staphylococcus   | <i>Staphylococcus auricularis</i>      | 0.00002            |
| Firmicutes     | Bacilli             | Bacillales         | Staphylococcaceae   | Staphylococcus   | <i>Staphylococcus pettenkoferi</i>     | 0.00002            |
| Firmicutes     | Bacilli             | Bacillales         | Staphylococcaceae   | Staphylococcus   | <i>Staphylococcus pseudintermedius</i> | 0.00002            |
| Firmicutes     | Bacilli             | Lactobacillales    | Carnobacteriaceae   |                  |                                        | 0.00002            |
| Firmicutes     | Bacilli             | Lactobacillales    | Enterococcaceae     | Enterococcus     | <i>Enterococcus cecorum</i>            | 0.00002            |
| Firmicutes     | Bacilli             | Lactobacillales    | Streptococcaceae    | Streptococcus    | <i>Streptococcus iniae</i>             | 0.00002            |
| Firmicutes     | Bacilli             | Lactobacillales    | Streptococcaceae    | Streptococcus    | <i>Streptococcus mitis</i>             | 0.00002            |
| Firmicutes     | Bacilli             | Lactobacillales    | Streptococcaceae    | Streptococcus    | <i>Streptococcus periodonticum</i>     | 0.00002            |
| Proteobacteria | Alphaproteobacteria | Caulobacterales    | Caulobacteraceae    | Brevundimonas    |                                        | 0.00002            |

| Phylum         | Class               | Order             | Family              | Genus                   | Specie                                   | Relative abundance |
|----------------|---------------------|-------------------|---------------------|-------------------------|------------------------------------------|--------------------|
| Proteobacteria | Alphaproteobacteria | Caulobacterales   | Caulobacteraceae    | Phenylobacterium        | <i>Phenylobacterium parvum</i>           | 0.00002            |
| Proteobacteria | Alphaproteobacteria | Hyphomicrobiales  | Aurantimonadaceae   | Aureimonas              |                                          | 0.00002            |
| Proteobacteria | Alphaproteobacteria | Hyphomicrobiales  | Bradyrhizobiaceae   | Tardiphaga              |                                          | 0.00002            |
| Proteobacteria | Alphaproteobacteria | Hyphomicrobiales  | Brucellaceae        | Brucella                |                                          | 0.00002            |
| Proteobacteria | Alphaproteobacteria | Hyphomicrobiales  | Brucellaceae        | Brucella                |                                          | 0.00002            |
| Proteobacteria | Alphaproteobacteria | Hyphomicrobiales  | Brucellaceae        |                         |                                          | 0.00002            |
| Proteobacteria | Alphaproteobacteria | Hyphomicrobiales  | Methylobacteriaceae |                         |                                          | 0.00002            |
| Proteobacteria | Alphaproteobacteria | Rhodospirillales  | Acetobacteraceae    | Roseomonas              |                                          | 0.00002            |
| Proteobacteria | Alphaproteobacteria | Rickettsiales     | Anaplasmataceae     | Wolbachia               |                                          | 0.00002            |
| Proteobacteria | Alphaproteobacteria | Rickettsiales     | Anaplasmataceae     |                         |                                          | 0.00002            |
| Proteobacteria | Alphaproteobacteria | Sphingomonadales  | Sphingomonadaceae   | Sphingomonas            |                                          | 0.00002            |
| Proteobacteria | Deltaproteobacteria |                   |                     |                         |                                          | 0.00002            |
| Proteobacteria | Gammaproteobacteria | Aeromonadales     | Aeromonadaceae      | Aeromonas               | <i>Aeromonas veronii</i>                 | 0.00002            |
| Proteobacteria | Gammaproteobacteria | Alteromonadales   | Alteromonadaceae    | Marinobacter            | <i>Marinobacter salsuginis</i>           | 0.00002            |
| Proteobacteria | Gammaproteobacteria | Enterobacteriales | Enterobacteriaceae  | Candidatus Blochmannia  |                                          | 0.00002            |
| Proteobacteria | Gammaproteobacteria | Enterobacteriales | Enterobacteriaceae  | Candidatus Blochmannia  |                                          | 0.00002            |
| Proteobacteria | Gammaproteobacteria | Enterobacteriales | Enterobacteriaceae  | Candidatus Doolittlea   | <i>Candidatus Doolittlea endobia</i>     | 0.00002            |
| Proteobacteria | Gammaproteobacteria | Enterobacteriales | Enterobacteriaceae  | Candidatus Ishikawaella | <i>Candidatus Ishikawaella capsulata</i> | 0.00002            |
| Proteobacteria | Gammaproteobacteria | Enterobacteriales | Enterobacteriaceae  | Candidatus Riesia       |                                          | 0.00002            |
| Proteobacteria | Gammaproteobacteria | Enterobacteriales | Enterobacteriaceae  | Cronobacter             | <i>Cronobacter sakazakii</i>             | 0.00002            |
| Proteobacteria | Gammaproteobacteria | Enterobacteriales | Enterobacteriaceae  | Klebsiella              | <i>Klebsiella oxytoca</i>                | 0.00002            |
| Proteobacteria | Gammaproteobacteria | Enterobacteriales | Enterobacteriaceae  | Klebsiella              | <i>Klebsiella variicola</i>              | 0.00002            |
| Proteobacteria | Gammaproteobacteria | Enterobacteriales | Enterobacteriaceae  | Raoultella              | <i>Raoultella planticola</i>             | 0.00002            |
| Proteobacteria | Gammaproteobacteria | Enterobacteriales | Erwiniaceae         | Erwinia                 | <i>Candidatus Erwinia haradaeae</i>      | 0.00002            |
| Proteobacteria | Gammaproteobacteria | Enterobacteriales | Morganellaceae      | Providencia             | <i>Providencia rettgeri</i>              | 0.00002            |
| Proteobacteria | Gammaproteobacteria | Enterobacteriales | Pectobacteriaceae   | Dickeya                 | <i>Dickeya dadantii</i>                  | 0.00002            |

| Phylum         | Class               | Order             | Family          | Genus          | Specie                         | Relative abundance |
|----------------|---------------------|-------------------|-----------------|----------------|--------------------------------|--------------------|
| Proteobacteria | Gammaproteobacteria | Enterobacteriales | Yersiniaceae    | Serratia       | <i>Serratia symbiotica</i>     | 0.00002            |
| Proteobacteria | Gammaproteobacteria | Pasteurellales    | Pasteurellaceae | Haemophilus    | <i>Haemophilus pittmaniae</i>  | 0.00002            |
| Proteobacteria | Gammaproteobacteria | Pasteurellales    | Pasteurellaceae | Pasteurella    | <i>Pasteurella multocida</i>   | 0.00002            |
| Proteobacteria | Gammaproteobacteria | Pseudomonadales   | Moraxellaceae   | Acinetobacter  | <i>Acinetobacter baumannii</i> | 0.00002            |
| Proteobacteria | Gammaproteobacteria | Pseudomonadales   | Moraxellaceae   | Acinetobacter  | <i>Acinetobacter lanii</i>     | 0.00002            |
| Proteobacteria | Gammaproteobacteria | Vibrionales       | Vibrionaceae    | Photobacterium | <i>Photobacterium damsela</i>  | 0.00002            |
| Spirochaetes   | Spirochaetia        | Spirochaetales    | Spirochaetaceae | Treponema      | <i>Treponema parvum</i>        | 0.00002            |

**Table S3.** Effect of oxytetracycline and streptomycin on *M. sacchari* survival rate.

| Concentration (µg/mL) | Dead aphids in each replicate | Total | Percentage % | Offspring in 5 days |
|-----------------------|-------------------------------|-------|--------------|---------------------|
| 0.0                   | 0,0,0                         | 0     | 0            | 5                   |
| 0.1                   | 1,0,0                         | 1     | 6.6          | 6                   |
| 1.0                   | 1,0,0                         | 1     | 6.6          | 1                   |
| 10                    | 3,3,2                         | 8     | 53.3         | 0                   |
| 100                   | 5,4,5                         | 14    | 93.3         | 0                   |
| 1000                  | 5,5,5                         | 15    | 100          | 0                   |
| 10000                 | 5,5,5                         | 15    | 100          | 0                   |

Data transformation for linear regression analysis

| Concentration (µg/mL) | log10 | Dead aphids (%) | Probit |
|-----------------------|-------|-----------------|--------|
| 0                     | -     | 0               | -      |
| 0.1                   | -1    | 6.6             | 3.45   |
| 1                     | 0     | 6.6             | 3.45   |
| 10                    | 1     | 53.3            | 5.08   |
| 100                   | 2     | 93.3            | 6.48   |
| 1000                  | 3     | 100             | 8.09   |
| 10000                 | 4     | 100             | 8.09   |

Multiple regression coefficient = 0.97040289; R<sup>2</sup> = 0.94168178

Adjusted R<sup>2</sup> = 10222; Typical error = 0.57287163

**Summary of statistics analysis by linear regression**

|            | Degrees of freedom | Sum of squares | Average of squares | F         | Critic value of F |
|------------|--------------------|----------------|--------------------|-----------|-------------------|
| Regression | 1                  | 21.1970057     | 21.1970057         | 64.589197 | 0.00130102        |
| Residues   | 4                  | 1.31272762     | 0.3281819          |           |                   |
| Total      | 5                  | 22.5097333     |                    |           |                   |

|              | Coefficients | Typical error | Statistical t |
|--------------|--------------|---------------|---------------|
| Interception | 4.12247619   | 0.311274478   | 13.2438619    |
| Variable X 1 | 1.10057143   | 0.136942512   | 8.03674045    |

| Probability | Inferior limit for a confidence threshold=95% | Superior limit for a confidence threshold= 95% |
|-------------|-----------------------------------------------|------------------------------------------------|
| 0.00018783  | 3.25823969                                    | 4.98671269                                     |
| 0.00130102  | 0.72035806                                    | 1.4807848                                      |

LC<sub>50</sub>, employing y=mx+b: 0.81818182

Antilog= 6.57933225

Calculated LC<sub>50</sub> = 6.6 µg/mL

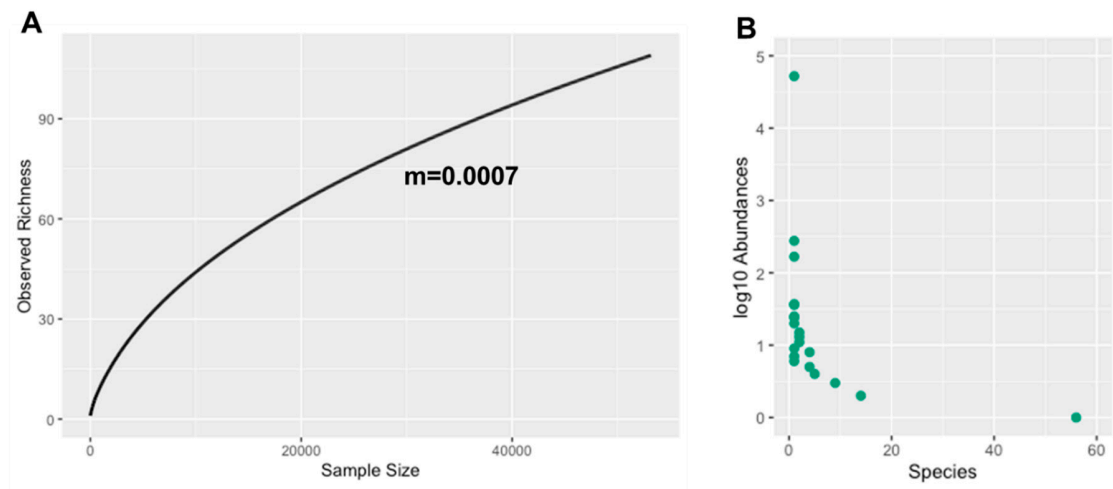

**Figure S1.** Rarefaction curve and abundance distribution in the microbial community of *M. sacchari*. A) Accumulation of species curve showing the slope value ( $m$ ) of the accumulation curve. B) Abundance distribution of the *M. sacchari* microbial community.
